# Supplementary material for: Bayesian risk prediction model for colorectal cancer mortality through integration of clinicopathologic and genomic data
Source: PubMed Central journal article supplement (PMC10257677; doi:10.1038/s41698-023-00406-8), 2023-06-10
Supplement: 41698_2023_406_MOESM1_ESM.pdf [file 41698_2023_406_MOESM1_ESM.pdf]

## SUPPLEMENTARY INFORMATION

**Supplementary Table 1.** List of all seventy-five variables considered as predictors in the models.

Features (N = 75)

| <u>Clinical (n = 11)</u>                                                                                                                                                                     | <u>Pathological (n = 14)</u>                                                                                                                                                                                                             | <u>Molecular (n = 33)</u>                                                                                                                                                                                                                                                                                                                                                                                           | <u>Immune (n = 15)</u>                                                                                                                                                               | <u>Bacterial (n = 2)</u>                                                      |
|----------------------------------------------------------------------------------------------------------------------------------------------------------------------------------------------|------------------------------------------------------------------------------------------------------------------------------------------------------------------------------------------------------------------------------------------|---------------------------------------------------------------------------------------------------------------------------------------------------------------------------------------------------------------------------------------------------------------------------------------------------------------------------------------------------------------------------------------------------------------------|--------------------------------------------------------------------------------------------------------------------------------------------------------------------------------------|-------------------------------------------------------------------------------|
| Gender,<br>Age (years),<br>Tumor site,<br>Family history,<br>Smoking history<br>(pack-years)                                                                                                 | pT stage,<br>Positive LN count,<br>Negative LN count,<br>Tumor differentiation,<br>Extraglandular necrosis,<br>Signet ring cell<br>component,<br>Extracellular mucinous<br>component,<br>Lymphovascular invasion,<br>Perineural invasion | MSI,<br>CIMP,<br>LINE-1 methylation<br>level,<br>Neoantigen load                                                                                                                                                                                                                                                                                                                                                    | Lymphocytic reaction<br>score,<br>TIL,<br>Intratumoral<br>periglandular reaction,<br>Peritumoral reaction,<br>Crohn's-like reaction                                                  | <i>Fusobacterium<br/>nucleatum</i> DNA,<br><i>Bifidobacterium spp.</i><br>DNA |
| <b>Pre-diagnosis<br/>factors:</b><br>Body mass index,<br>Physical activity,<br>Alcohol intake,<br>Red meat intake<br>(daily servings),<br>Regular aspirin<br>use<br>Regular ibuprofen<br>use | Immunohistochemical<br>expression:<br>CD274 (PD-L1), CTNNB1<br>(beta-catenin), PDCD1<br>(PD-1), PDCD1LG2 (PD-<br>L2), PTGS2<br>(cyclooxygenase 2)                                                                                        | <b>Pyrosequencing<br/>(mutations):</b><br><i>KRAS</i> ,<br><i>BRAF</i> ,<br><i>PIK3CA</i>                                                                                                                                                                                                                                                                                                                           | <b>Tumor &amp; stroma T cell<br/>densities:</b> Regulatory T<br>cells,<br>Memory helper T cells,<br>Naïve helper T cells,<br>Memory cytotoxic T<br>cells,<br>Naïve cytotoxic T cells |                                                                               |
|                                                                                                                                                                                              |                                                                                                                                                                                                                                          | <b>Genes with non-<br/>silent mutations<br/>in &gt; 5% of patients<br/>included in WES:</b><br><i>ACVR2A, ADAMTS3,</i><br><i>APC, ARID1A,</i><br><i>ATXN2L, AXIN2,</i><br><i>B2M, BCL9L,</i><br><i>BMPR2, CHD4,</i><br><i>FBXW7, FHOD3,</i><br><i>FRMD4A, HLA-B,</i><br><i>LARP4B, MUC17,</i><br><i>PTEN, RNF43,</i><br><i>SMAD2, SMAD4,</i><br><i>SOX9, TCF7L2,</i><br><i>TCF20, TP53, UBR1,</i><br><i>ZFP36L2</i> |                                                                                                                                                                                      |                                                                               |

Abbreviations: CIMP, CpG island methylator phenotype; LINE-1, long interspersed nucleotide element-1; LN, lymph node; MSI, microsatellite instability; TIL, tumor-infiltrating lymphocytes; WES, whole exome sequencing.

**Supplementary Table 2.** BART model performance for five-year colorectal cancer-specific survival across 5-fold cross validation, using overall stage, pT stage, or pN stage alone as predictor variable vs 7 significant variables. Median values are bolded.

| Folds | C-Statistics |             |             |             |
|-------|--------------|-------------|-------------|-------------|
|       | Stage        | pT stage    | pN stage    | 7 variables |
| 1     | 0.65         | 0.41        | 0.63        | 0.77        |
| 2     | 0.55         | 0.50        | 0.55        | 0.67        |
| 3     | <b>0.62</b>  | <b>0.47</b> | <b>0.58</b> | 0.83        |
| 4     | 0.49         | 0.47        | 0.54        | 0.73        |
| 5     | 0.66         | 0.46        | 0.71        | <b>0.74</b> |

**Supplementary Table 3:** Full list of 115 genes with single nucleotide variations in whole exome sequencing data on colorectal cancer in the Health Professionals Follow-up Study and the Nurses' Health Study.

|                                                                                                                                                                                                                                                                                                                                                                                                                                                                                                                                                                                                                                                                                                                                                                                                                                                                     |
|---------------------------------------------------------------------------------------------------------------------------------------------------------------------------------------------------------------------------------------------------------------------------------------------------------------------------------------------------------------------------------------------------------------------------------------------------------------------------------------------------------------------------------------------------------------------------------------------------------------------------------------------------------------------------------------------------------------------------------------------------------------------------------------------------------------------------------------------------------------------|
| <p><i>ABCF2, ACOXL, ACVR2A, ADAM30, ADAMTS3, ADD2, AHI1, APC, ARHGAP5, ARID1A, ARPC1B, ASXL1, ATP6V1B1, ATXN2L, AXIN2, B2M, BCL9L, BMPR2, C6orf136, C7orf31, CASD1, CASP8, CHD4, CTCF, CTNNB1, CUL5, DAO, DGKA, DIAPH1, DRD3, DUSP16, EI24, ELF3, FAM171B, FBXW7, FHOD3, FLYWCH1, FRMD4A, GDF5, GORASP1, GRHPR, HEATR2, HLA-A, HLA-B, HSPA1L, HTR3C, IL7R, ING1, ITIH1, KLF3, KLF5, LARP4B, LIMK1, MAP2K1, MAP2K7, MARK2, MGAT3, MOV10, MST4, MUC17, MVK, MYBL2, NAT10, NBN, NCAPD3, NEK2, NKTR, NRAS, OCRL, PABPC1L, PACSIN1, PAN3, PAX6, PCBP1, PLEKHA6, PRKCQ, PTEN, RANBP9, RB1, RBM10, RBM12, RNF128, RNF43, RUFY1, SAMM50, SERPING1, SIN3A, SMAD2, SMAD4, SNAPC1, SOAT1, SOX9, SRRT, SSH1, SYNCRIP, SYNGR2, TCF20, TCF7, TCF7L2, TDRD1, TEX14, TGIF1, TMEM201, TNFRSF4, TNFRSF9, TP53, TPTE2, UBR1, USP5, WDR86, WNT16, XYLT2, ZBTB20, ZFP36L2, ZNRF3</i></p> |
|---------------------------------------------------------------------------------------------------------------------------------------------------------------------------------------------------------------------------------------------------------------------------------------------------------------------------------------------------------------------------------------------------------------------------------------------------------------------------------------------------------------------------------------------------------------------------------------------------------------------------------------------------------------------------------------------------------------------------------------------------------------------------------------------------------------------------------------------------------------------|

**Supplementary Figure 1.**

**Survival based on BART risk model prediction quantiles and stage**

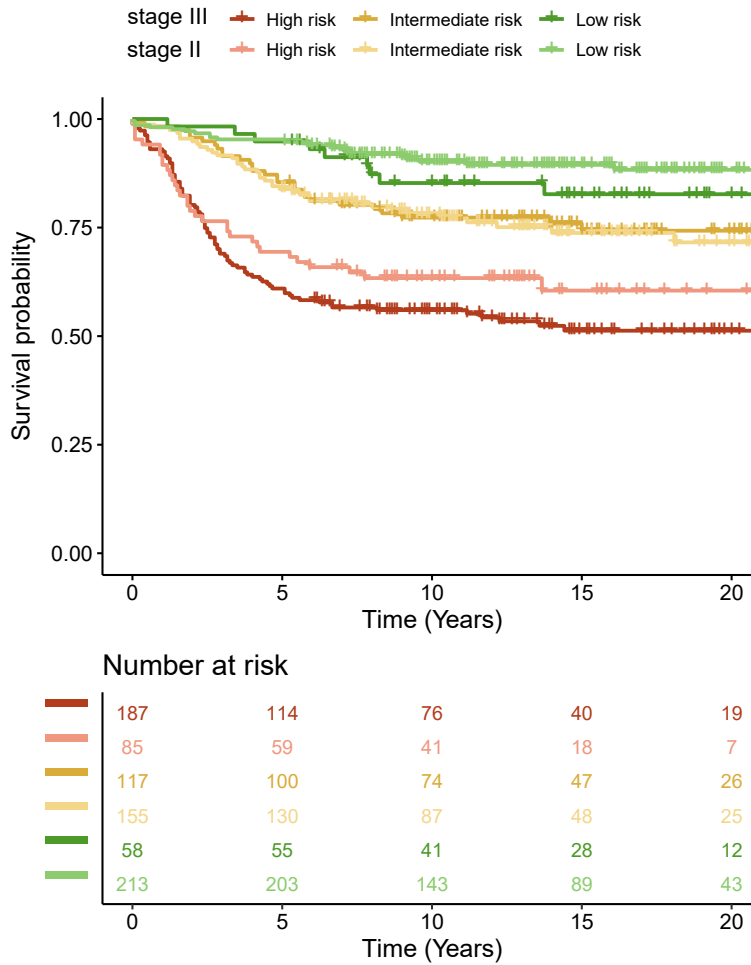

| Ref: high risk stage III | HR   | 95% CI    | P-value           |
|--------------------------|------|-----------|-------------------|
| High risk stage II       | 0.79 | 0.53-1.19 | 0.26              |
| Int risk stage III       | 0.43 | 0.28-0.65 | <0.0001           |
| Int risk stage II        | 0.42 | 0.29-0.62 | <0.0001           |
| Low risk stage III       | 0.24 | 0.12-0.48 | <0.0001           |
| Low risk stage II        | 0.16 | 0.10-0.26 | <0.0001           |
| <b>Overall</b>           |      |           | <b>&lt;0.0001</b> |

Kaplan-Meier plot for survival in patients with Stage II/III colorectal cancer in TCGA dataset. Table shows Cox proportional hazards model using risk quantiles and overall P-value by Log-rank test.

Abbreviations: BART, Bayesian additive regression trees; CI, confidence interval; HR, hazard ratio.

**Supplementary Figure 2.**

**ROC curve for TCGA external validation**

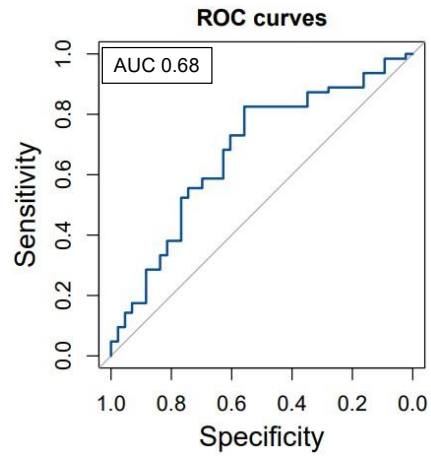

ROC curve for external validation of BART risk model with TCGA data

Abbreviations: AUC, area under the ROC curve; ROC, Receiver Operating Characteristics.

### Supplementary Figure 3.

#### User interface for BART risk prediction model

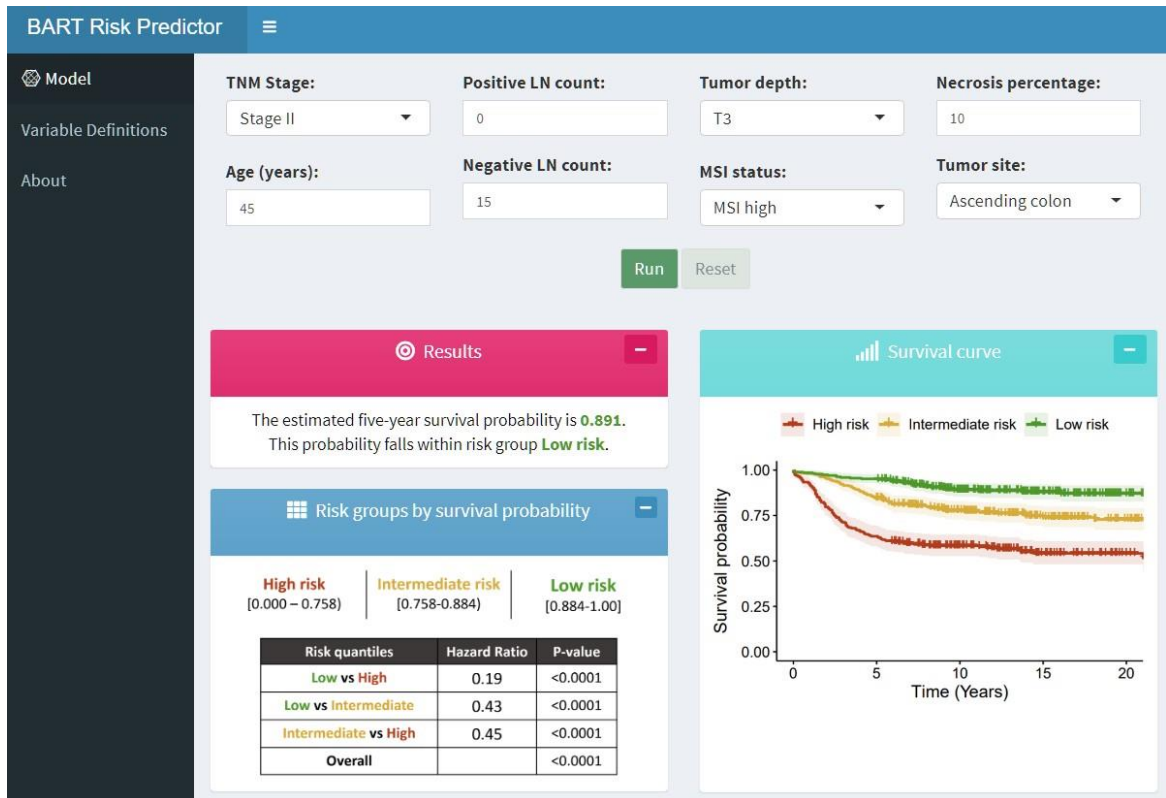

User interface takes 7 variables as input, runs the BART risk prediction model, and outputs survival probability along with risk category (high, intermediate, and low risk). An experimental version is available for download at <https://github.com/mm-zhao/BART>.
